# Supplementary material
Source: PubMed Central journal article supplement (PMC2676892)
Supplement: NIHMS108934-supplement-Table_1S.pdf [file NIHMS108934-supplement-Table_1S.pdf]

| <b>Gene Symbol</b> | <b>Gene Name</b>                                                                                                    |
|--------------------|---------------------------------------------------------------------------------------------------------------------|
| FOSL2              | FOS-like antigen 2                                                                                                  |
| TMEM2              | transmembrane protein 2                                                                                             |
| KCTD20             | potassium channel tetramerisation domain containing 20                                                              |
| FTH1               | ferritin, heavy polypeptide 1                                                                                       |
| FTHP1              | ferritin, heavy polypeptide pseudogene 1                                                                            |
| SYTL3              | synaptotagmin-like 3                                                                                                |
| NAP1L5             | nucleosome assembly protein 1-like 5                                                                                |
| SRGN               | serglycin                                                                                                           |
| ALS2CR16           | amyotrophic lateral sclerosis 2 (juvenile) chromosome region, candidate 16                                          |
| NR3C1              | nuclear receptor subfamily 3, group C, member 1 (glucocorticoid receptor)                                           |
| SESN3              | sestrin 3                                                                                                           |
| CD55               | CD55 molecule, decay accelerating factor for complement (Cromer blood group)                                        |
| EBI2               | Epstein-Barr virus induced gene 2 (lymphocyte-specific G protein-coupled receptor)                                  |
| PGAP1              | GPI deacylase                                                                                                       |
| NFE2L2             | nuclear factor (erythroid-derived 2)-like 2                                                                         |
| CREM               | cAMP responsive element modulator                                                                                   |
| NR4A2              | nuclear receptor subfamily 4, group A, member 2                                                                     |
| JOSD1              | Josephin domain containing 1                                                                                        |
| USP36              | ubiquitin specific peptidase 36                                                                                     |
| ATP1B3             | ATPase, Na <sup>+</sup> /K <sup>+</sup> transporting, beta 3 polypeptide                                            |
| GARNL1             | GTPase activating Rap/RanGAP domain-like 1                                                                          |
| NUP98              | nucleoporin 98kDa                                                                                                   |
| SC5DL              | sterol-C5-desaturase (ERG3 delta-5-desaturase homolog, <i>S. cerevisiae</i> )-like                                  |
| MTMR6              | myotubularin related protein 6                                                                                      |
| C3orf26            | chromosome 3 open reading frame 26                                                                                  |
| PTP4A1             | protein tyrosine phosphatase type IVA, member 1                                                                     |
| ELL2               | elongation factor, RNA polymerase II, 2                                                                             |
| JMY                | junction-mediating and regulatory protein                                                                           |
| NANS               | N-acetylneuraminic acid synthase (sialic acid synthase)                                                             |
| UAP1               | UDP-N-acetylglucosamine pyrophosphorylase 1                                                                         |
| CYP51A1            | cytochrome P450, family 51, subfamily A, polypeptide 1                                                              |
| C14orf24           | chromosome 14 open reading frame 24                                                                                 |
| SETD2              | SET domain containing 2                                                                                             |
| POLR3E             | polymerase (RNA) III (DNA directed) polypeptide E (80kD)                                                            |
| ZNF331             | zinc finger protein 331                                                                                             |
| SYAP1              | synapse associated protein 1, SAP47 homolog ( <i>Drosophila</i> )                                                   |
| CCDC93             | coiled-coil domain containing 93                                                                                    |
| ARHGEF7            | Rho guanine nucleotide exchange factor (GEF) 7                                                                      |
| RBM12              | RNA binding motif protein 12                                                                                        |
| ARHGAP5            | Rho GTPase activating protein 5                                                                                     |
| HMGCR              | 3-hydroxy-3-methylglutaryl-Coenzyme A reductase                                                                     |
| GK                 | glycerol kinase                                                                                                     |
| PFKFB3             | 6-phosphofructo-2-kinase/fructose-2,6-biphosphatase 3                                                               |
| LOC653506          | similar to meteorin, glial cell differentiation regulator-like                                                      |
| MAD1L1             | MAD1 mitotic arrest deficient-like 1 (yeast)                                                                        |
| SLC2A3             | solute carrier family 2 (facilitated glucose transporter), member 3                                                 |
| SLC2A14            | solute carrier family 2 (facilitated glucose transporter), member 14                                                |
| DDIT4              | DNA-damage-inducible transcript 4                                                                                   |
| DUSP4              | dual specificity phosphatase 4                                                                                      |
| SOCS3              | suppressor of cytokine signaling 3                                                                                  |
| RGS1               | regulator of G-protein signaling 1                                                                                  |
| PRNP               | prion protein (p27-30) (Creutzfeldt-Jakob disease, Gerstmann-Strausler-Scheinker syndrome, fatal familial insomnia) |
| ZC3HAV1            | zinc finger CCCH-type, antiviral 1                                                                                  |

|           |                                                                                              |
|-----------|----------------------------------------------------------------------------------------------|
| LOC285074 | hypothetical protein LOC285074                                                               |
| DUSP2     | dual specificity phosphatase 2                                                               |
| PSME4     | proteasome (prosome, macropain) activator subunit 4                                          |
| AREG      | amphiregulin (schwannoma-derived growth factor)                                              |
| SOS2      | son of sevenless homolog 2 (Drosophila)                                                      |
| CHD1      | chromodomain helicase DNA binding protein 1                                                  |
| MCL1      | myeloid cell leukemia sequence 1 (BCL2-related)                                              |
| ZDBF2     | zinc finger, DBF-type containing 2                                                           |
| CD44      | CD44 molecule (Indian blood group)                                                           |
| SRPRB     | signal recognition particle receptor, B subunit                                              |
| PLSCR1    | phospholipid scramblase 1                                                                    |
| EXT1      | exostoses (multiple) 1                                                                       |
| ADAM9     | ADAM metallopeptidase domain 9 (meltrin gamma)                                               |
| RAMP1     | receptor (G protein-coupled) activity modifying protein 1                                    |
| TACC1     | transforming, acidic coiled-coil containing protein 1                                        |
| GEMIN4    | gem (nuclear organelle) associated protein 4                                                 |
| TAF9B     | TAF9B RNA polymerase II, TATA box binding protein (TBP)-associated factor, 31kDa             |
| AGPAT6    | 1-acylglycerol-3-phosphate O-acyltransferase 6 (lysophosphatidic acid acyltransferase, zeta) |
| USP24     | ubiquitin specific peptidase 24                                                              |
| CCPG1     | cell cycle progression 1                                                                     |
| INSIG2    | insulin induced gene 2                                                                       |
| MAP3K8    | mitogen-activated protein kinase kinase kinase 8                                             |
| DIRC2     | disrupted in renal carcinoma 2                                                               |
| DUSP1     | dual specificity phosphatase 1                                                               |
| RBBP8     | retinoblastoma binding protein 8                                                             |
| FADS3     | fatty acid desaturase 3                                                                      |
| TP53INP2  | tumor protein p53 inducible nuclear protein 2                                                |
| NR4A3     | nuclear receptor subfamily 4, group A, member 3                                              |
| OBFC2A    | oligonucleotide/oligosaccharide-binding fold containing 2A                                   |
| RBKS      | ribokinase                                                                                   |
| SNF1LK2   | SNF1-like kinase 2                                                                           |
| LRRFIP1   | leucine rich repeat (in FLII) interacting protein 1                                          |
| ZBTB10    | zinc finger and BTB domain containing 10                                                     |
| POLB      | polymerase (DNA directed), beta                                                              |
| GOT1      | glutamic-oxaloacetic transaminase 1, soluble (aspartate aminotransferase 1)                  |
| RANGAP1   | Ran GTPase activating protein 1                                                              |
| GEM       | GTP binding protein overexpressed in skeletal muscle                                         |
| AXUD1     | AXIN1 up-regulated 1                                                                         |
| DUSP5     | dual specificity phosphatase 5                                                               |
| HOMER1    | homer homolog 1 (Drosophila)                                                                 |
| HNRNPA0   | heterogeneous nuclear ribonucleoprotein A0                                                   |
| REL       | v-rel reticuloendotheliosis viral oncogene homolog (avian)                                   |
| FNTA      | farnesyltransferase, CAAX box, alpha                                                         |
| THAP9     | THAP domain containing 9                                                                     |
| DUSP10    | dual specificity phosphatase 10                                                              |
| HSPA9     | heat shock 70kDa protein 9 (mortalin)                                                        |
| PIGB      | phosphatidylinositol glycan anchor biosynthesis, class B                                     |
| GZFI      | GDNF-inducible zinc finger protein 1                                                         |
| CLCN3     | chloride channel 3                                                                           |
| TGFBR1    | transforming growth factor, beta receptor I (activin A receptor type II-like kinase, 53kDa)  |
| FLJ40869  | hypothetical protein FLJ40869                                                                |
| HSPE1     | heat shock 10kDa protein 1 (chaperonin 10)                                                   |
| SAT1      | spermidine/spermine N1-acetyltransferase 1                                                   |
| ZCCHC2    | zinc finger, CCHC domain containing 2                                                        |

|          |                                                                                      |
|----------|--------------------------------------------------------------------------------------|
| SLC1A4   | solute carrier family 1 (glutamate/neutral amino acid transporter), member 4         |
| PDE4A    | phosphodiesterase 4A, cAMP-specific (phosphodiesterase E2 dunce homolog, Drosophila) |
| GNL1     | guanine nucleotide binding protein-like 1                                            |
| RFTN1    | raftlin, lipid raft linker 1                                                         |
| PLEKHB2  | pleckstrin homology domain containing, family B (evectins) member 2                  |
| ARIH2    | ariadne homolog 2 (Drosophila)                                                       |
| IRF2BP2  | interferon regulatory factor 2 binding protein 2                                     |
| JUNB     | jun B proto-oncogene                                                                 |
| SEC23B   | Sec23 homolog B ( <i>S. cerevisiae</i> )                                             |
| PER1     | period homolog 1 (Drosophila)                                                        |
| PHF20    | PHD finger protein 20                                                                |
| NUPL1    | nucleoporin like 1                                                                   |
| PBEF1    | pre-B-cell colony enhancing factor 1                                                 |
| C9orf72  | chromosome 9 open reading frame 72                                                   |
| SLC16A6  | solute carrier family 16, member 6 (monocarboxylic acid transporter 7)               |
| FLJ43663 | hypothetical protein FLJ43663                                                        |
| FAM133B  | family with sequence similarity 133, member B                                        |
| NDNL2    | necdin-like 2                                                                        |

**Table 1S.** Complete list of genes comprising cluster #2 of Figure 2.
